# Supplementary material
Source: publisher site journal article supplement (https://www.kjim.org/upload/media/kjim-2024-432-Supplementary-Fig-3.pdf)
Supplement: Supplementary file 1 [file kjim-2024-432-Supplementary-Fig-3.pdf]

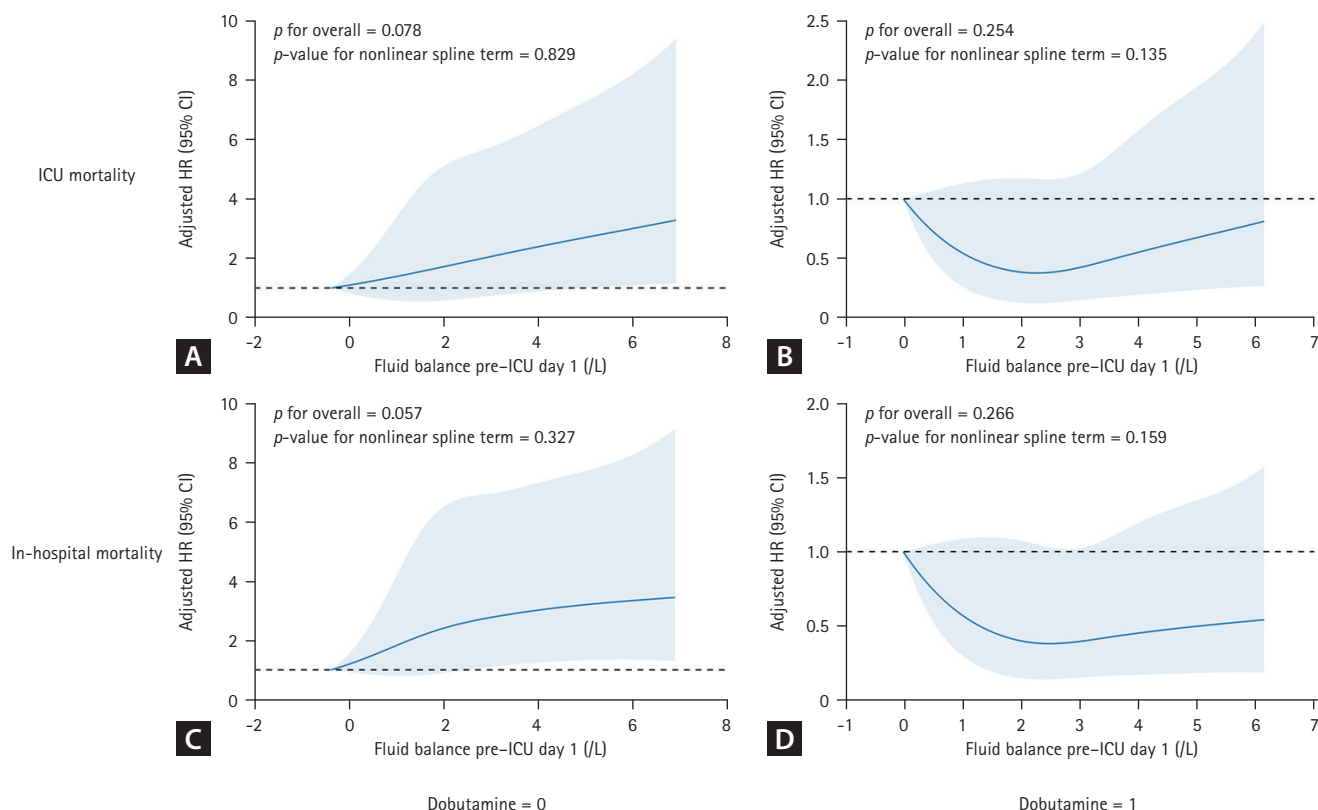

**Supplementary Figure 3.** Cubic spline curves showing the associations between fluid balance (pre-ICU and ICU day 1) and mortality rates ([A] and [B] indicate ICU mortality; and [C] and [D] indicate in-hospital mortality) according to dobutamine treatment ([A] and [C] indicate non-dobutamine group; [B] and [D] indicate dobutamine group). The x-axis quantifies fluid balance in liters, while the y-axis represents the HR, adjusted for a comprehensive set of clinical variables: age, sex, clinical frailty scale, SAPS3, SOFA, lactate levels, vasopressin use, chronic kidney disease, hematologic malignancy, and CRRT. ICU, intensive care unit; HR, hazard ratio; SAPS3, Simplified Acute Physiology Score 3; SOFA, sequential organ failure assessment; CRRT, continuous renal replacement therapy; CI, confidence interval.
